1 **Title: Deletion disrupts a conserved antibody epitope in a SARS-CoV-2 variant of concern**

2

3 **Running Title:** Transmission of an unexpected SARS-CoV-2 RBD deletion variant

4

5 **Authors:** Linda J. Rennick<sup>1,2</sup>, Lindsey R. Robinson-McCarthy<sup>3,4</sup>, Sham Nambulli<sup>1,2</sup>, W. Paul

6 Duprex<sup>1,2\*</sup> and Kevin R. McCarthy<sup>1,2\*</sup>

7

8 **Affiliations:** <sup>1</sup> The Center for Vaccine Research, University of Pittsburgh School of Medicine,

9 Pittsburgh PA <sup>2</sup> The Department of Microbiology and Molecular Genetics, University of

10 Pittsburgh School of Medicine, Pittsburgh PA <sup>3</sup> Hillman Cancer Center, Pittsburgh PA and <sup>4</sup> The

11 Department of Pathology, University of Pittsburgh School of Medicine, Pittsburgh PA.

12

13 **Abstract:**

14 Multiple SARS-CoV-2 variants with altered antigenicity have emerged and spread

15 internationally. In one lineage of global concern, we identify a transmitted variant with a deletion

16 in its receptor binding domain (RBD) that disrupts an epitope which is conserved across

17 sarbecoviruses. Overcoming antigenic variation by selectively focusing immune pressure on this

18 conserved site may, ultimately, drive viral resistance.

19

20 **Main Text:**

21 The SARS-CoV-2 spike (S) glycoprotein is the target of protective antibodies and sole antigen

22 delivered in widely deployed vaccines <sup>1-4</sup>. Emergent variants (B.1.1.7, B.1.351, P.1) have

23 independently acquired a common series of mutations that confer resistance to therapeutic

24 antibodies and serum from infected or vaccinated individuals. Variant spread has been rapid.

25 Reformulated therapies and vaccines are in development. Directing antibodies to conserved

26 sites therapeutically, as a consequence of immune recall or via designed immunogens can, in

27 theory, overcome antigenic variation. These strategies rely upon sites that slowly, if ever, accrue  
28 diversity. We identify a transmitted B.1.1.7 variant with a deletion in a site of pan-sarbecoviruses  
29 conservation. This deletion disrupts the binding of an antibody that engages both SARS-CoV  
30 and SARS-CoV-2. The acquisition of antigenic novelty in S glycoprotein has been recurrent and  
31 convergent. By extension conservation at this site may not persist.

32

33 Using sequences deposited in the GISAID database<sup>5</sup>, we have monitored variants of concern  
34 for the acquisition of additional epitope-altering mutations. We identified a transmission cluster  
35 of six identifiably different individuals that share a nine-nucleotide deletion within the S gene  
36 encoding the RBD. These viruses belong to the B.1.1.7 lineage, which had already acquired two  
37 independent deletions in recurrent deletion region <sup>6</sup> (RDR) 1 ( $\Delta$ 69-70) and RDR2 ( $\Delta$ 144/145).  
38 Spread via human-to-human transmission is likely given the timing of sample collection,  
39 geographic proximity and the clustering of sequences within a phylogeny of contemporaneously  
40 circulating B.1.1.7 isolates (Fig. 1).

41

42 The deletion removes residues 375-377 of the RBD. All three have been conserved for the  
43 duration of the pandemic. We examined their conservation among divergent sarbecoviruses,  
44 including SARS-CoV, bat and pangolin sequences (Fig. 2a). Among these isolates the three  
45 codons differ only by synonymous nucleotide substitutions suggesting selective pressures to  
46 preserve the identity of each amino acid. Residues 375-377 contribute to an extended surface  
47 that is broadly conserved among sarbecovirus (Fig. 2b) . This site is distal from the interface  
48 between RBD and its receptor angiotensin-converting enzyme 2 (ACE2) <sup>7</sup> . In the “three RBD”  
49 down state of the S glycoprotein trimer, residues 375-377 form a  $\beta$ -strand which is recessed and  
50 facing inward to the trimer 3-fold axis of symmetry. Sampling of “RBD-up” conformations and  
51 receptor engagement exposes this site.

52

53 Despite its transient exposure, the conserved surface is immunogenic. A number of reported  
54 antibodies, isolated from different donors, engage this site and can bind/neutralize other  
55 sarbecoviruses. Antibody CR3022, elicited by a SARS-CoV infection during the 2003-2004  
56 outbreak, initially defined this antibody class and their common epitope<sup>8-10</sup> (Fig. 2b). These  
57 antibodies inhibit viral replication but have limited neutralization potency in single round infection  
58 assays<sup>11-13</sup>. CR3022, like others makes direct contacts with residues 375-377. We introduced  
59  $\Delta 375-377$  into an S glycoprotein expression construct and detected expression by indirect  
60 immunofluorescence using an N-terminal domain binding antibody, 4A8<sup>14</sup>. The formation of  
61 multinucleated, syncytia demonstrates S- $\Delta 375-377$  remains a functional membrane fusogen  
62 (Fig. 2c). However, the deletion abolishes CR3022 binding. While evolutionary conserved, this  
63 site is mutable and a single mutation event results in antibody escape.

64

65 SARS-CoV-2 only recently crossed into humans. Mounting evidence suggests that specific  
66 variants of concern have evolved some resistance to dominant humoral responses. Specifically  
67 how SARS-CoV-2 will adapt to immune pressures imposed by a human antibody repertoire is to  
68 be determined. This transmitted variant, with a deletion at an otherwise conserved site  
69 demonstrates that antigenic stability in animal species may not always extend to humans.

70

71 Focused genetic surveillance has not identified additional  $\Delta 375-377$ -linked cases. The virus was  
72 sufficiently fit to transmit between at least five individuals and to define their viral consensus  
73 sequences. This early period of S evolution has been defined by recurrent, convergent  
74 evolution. Many defining mutations in current variants of concern are identical or functionally  
75 equivalent. The alteration of a conserved epitope by  $\Delta 375-377$  not only represents an additional  
76 antigenic step in a variant of concern (B.1.1.7), but also demonstrates a capacity of this site to  
77 acquire antibody resistance rapidly.

78

79 The emergence of variants of concern and their continued evolution demonstrate that S is not  
80 as antigenically stable as initially hypothesized<sup>15,16</sup>. Second generation vaccines may  
81 selectively focus antibodies to conserved epitopes, either by design or as a consequence of  
82 recalling responses from immunologic memory. The conserved site tolerates both S-Δ375-377  
83 and mutations about its periphery<sup>17-20</sup>. It may not be a suitable target for therapeutic antibodies  
84 or immune focusing immunogens.

85

#### 86 **Acknowledgements:**

87 We gratefully acknowledge the authors from the originating laboratories and the submitting  
88 laboratories, who generated and shared via GISAID genetic sequence data on which this  
89 research is based (Table 1). We sincerely apologize to the many authors we could not cite due  
90 to limitations on references. This work was supported by The University of Pittsburgh, the  
91 Center for Vaccine Research (WPD and KRM), The Richard King Mellon Foundation, the Henry  
92 L. Hillman Foundation and the Commonwealth of Pennsylvania, Department of Community and  
93 Economic Development (WPD)

94

#### 95 **Author contributions:**

96 L.J.R., L.R.R-M, S.N, W.P.D and K.R.M designed the experiments; L.J.R., L.R.R-M, S.N and  
97 K.R.M. performed the experiments; L.J.R., L.R.R-M, S.N, W.P.D and K.R.M. analyzed data and  
98 L.J.R., L.R.R-M, S.N, W.P.D and K.R.M wrote the manuscript.

99 **Methods**

100 **Materials and Methods**

101

102 *Sequence analysis:*

103 Sequences were obtained from the publicly available GISAID database <sup>5</sup> and acknowledged in  
104 supporting Table 1. Sequence analysis was performed in Geneious (Biomatters, New Zealand).  
105 To identify deletion variants in S gene, sequences were mapped to NCBI reference sequence  
106 MN985325 (SARS-CoV-2/human/USA/WA-CDC-WA1/2020), the S gene open reading frame  
107 was extracted, remapped to reference and parsed for deletions using a search for gaps  
108 function.

109

110 All sequences were aligned in MAFFT <sup>21,22</sup> and adjusted manually for consistency. To evaluate  
111 the phylogenetic relationships between S- $\Delta$ 375-377 variants and isolates from  
112 contemporaneously circulating B.1.1.7 we obtained sequences of B.1.1.7 variants from the  
113 United Kingdom from samples that were obtained from Mid-late December 2020. The first  
114 sequenced B.1.1.7 isolate hCoV-19/England/MILK-9E2FE0/2020 (EPI\_ISL\_581117), was  
115 included. FastTree <sup>23</sup> was used to generate a preliminary phylogeny. Branches from a node  
116 containing S- $\Delta$ 375-377 variants were extracted and along with hCoV-19/England/MILK-  
117 9E2FE0/2020 (EPI\_ISL\_581117) were re-aligned. The final Maximum- Likelihood phylogenetic  
118 trees were calculated using RAxML <sup>24</sup> using a general time reversible model with optimization of  
119 substitution rates (GTR GAMMA setting), starting with a completely random tree, using rapid  
120 Bootstrapping and search for best-scoring ML tree with 10,000 bootstraps of support performed.  
121 The phylogeny of sarbecoviruses used the indicated sequences and were produced using  
122 RAxML <sup>24</sup> with the same parameters as above.

123

124 *Cell lines:*

125 Human 293F cells were maintained at 37° Celsius with 5% CO<sub>2</sub> in FreeStyle 293 Expression  
126 Medium (ThermoFisher) supplemented with penicillin and streptomycin. Vero E6 cells were  
127 maintained at 37° Celsius with 5% CO<sub>2</sub> in high glucose DMEM (Invitrogen) supplemented with  
128 1% (v/v) Glutamax (Invitrogen) and 10% (v/v) fetal bovine serum (Invitrogen).

129

130 *Recombinant IgG expression and purification:*

131 The heavy and light chain variable domains of 4A8<sup>14</sup> and CR3022<sup>8</sup> were synthesized by  
132 Integrated DNA Technologies (Coralville, Iowa) and cloned into a modified human pVRC8400  
133 expression vector encoding for full length human or mouse IgG1 heavy chains and human  
134 kappa light chains<sup>25</sup>. IgGs were produced by polyethylenimine (PEI) facilitated, transient  
135 transfection of 293F cells that were maintained in FreeStyle 293 Expression Medium.  
136 Transfection complexes were prepared in Opti-MEM and added to cells. Five days post-  
137 transfection supernatants were harvested, clarified by low-speed centrifugation, adjusted to pH  
138 5 by addition of 1 M 2-(N-morpholino)ethanesulfonic acid (MES) (pH 5.0), and incubated  
139 overnight with Pierce Protein G agarose resin (Pierce, ThermoFisher). The resin was collected  
140 in a chromatography column, washed with a column volume of 100 mM sodium chloride 20 mM  
141 (MES) (pH 5.0) and eluted in 0.1 M glycine (pH 2.5) which was immediately neutralized by 1 M  
142 TRIS(hydroxymethyl)aminomethane (pH 8). IgGs were then dialyzed against phosphate  
143 buffered saline (PBS) pH 7.4.

144

145 *Cloning and transfection of SARS-CoV-2 spike protein deletion mutants:*

146 S-Δ375-377 was generated in HDM\_SARS2\_Spike\_del21\_D614G<sup>26</sup> a plasmid containing  
147 SARS-CoV-2 S protein lacking the 21 C-terminal amino acids.

148 HDM\_SARS2\_Spike\_del21\_D614G was a gift from Jesse Bloom (Addgene plasmid # 158762;

149 <http://n2t.net/addgene:158762>; RRID:Addgene\_158762). The region containing amino acids

150 375-377 was excised using appropriate restriction enzymes and replaced by a synthetically  
151 generated gBlock (Integrated DNA Technologies) with amino acids 375-377 deleted. The  
152 Gibson Assembly reaction, transformations, clone screening, plasmid DNA preparation and  
153 transfections were performed as described previously <sup>6</sup>

154

#### 155 *Indirect immunofluorescence:*

156 Indirect immunofluorescence was performed as previously reported <sup>27</sup>. Cells were transfected  
157 with the SARS-CoV-2 S-Δ375-377 protein deletion mutant and controls. Primary monoclonal  
158 antibodies were 4A8 (mouse Fc; 1 μg/ml) and CR3022 (human Fc; 4 μg/ml), and secondary  
159 antibodies were goat anti-mouse Alexa Fluor-568, Invitrogen, and goat anti-human Alexa  
160 Fluor-488, Invitrogen, both used at 1:400 dilution.

161

#### 162 *Structure visualization:*

163 Structural figures were rendered in Pymol (The PyMOL Molecular Graphics System, Version 2.0  
164 Schrödinger, LLC).

165

#### 166 **References**

- 167 1 Baden, L. R. *et al.* Efficacy and Safety of the mRNA-1273 SARS-CoV-2 Vaccine. *N Engl*  
168 *J Med* **384**, 403-416, doi:10.1056/NEJMoa2035389 (2021).
- 169 2 Logunov, D. Y. *et al.* Safety and efficacy of an rAd26 and rAd5 vector-based  
170 heterologous prime-boost COVID-19 vaccine: an interim analysis of a randomised  
171 controlled phase 3 trial in Russia. *Lancet* **397**, 671-681, doi:10.1016/S0140-  
172 6736(21)00234-8 (2021).
- 173 3 Polack, F. P. *et al.* Safety and Efficacy of the BNT162b2 mRNA Covid-19 Vaccine. *N*  
174 *Engl J Med* **383**, 2603-2615, doi:10.1056/NEJMoa2034577 (2020).
- 175 4 Voysey, M. *et al.* Safety and efficacy of the ChAdOx1 nCoV-19 vaccine (AZD1222)  
176 against SARS-CoV-2: an interim analysis of four randomised controlled trials in Brazil,  
177 South Africa, and the UK. *Lancet* **397**, 99-111, doi:10.1016/S0140-6736(20)32661-1  
178 (2021).
- 179 5 Shu, Y. & McCauley, J. GISAID: Global initiative on sharing all influenza data - from  
180 vision to reality. *Euro Surveill* **22**, doi:10.2807/1560-7917.ES.2017.22.13.30494 (2017).
- 181 6 McCarthy, K. R. *et al.* Recurrent deletions in the SARS-CoV-2 spike glycoprotein drive  
182 antibody escape. *Science*, eabf6950, doi:10.1126/science.abf6950 (2021).

- 183 7 Lan, J. *et al.* Structure of the SARS-CoV-2 spike receptor-binding domain bound to the  
184 ACE2 receptor. *Nature* **581**, 215-220, doi:10.1038/s41586-020-2180-5 (2020).
- 185 8 ter Meulen, J. *et al.* Human monoclonal antibody combination against SARS  
186 coronavirus: synergy and coverage of escape mutants. *PLoS Med* **3**, e237,  
187 doi:10.1371/journal.pmed.0030237 (2006).
- 188 9 Tian, X. *et al.* Potent binding of 2019 novel coronavirus spike protein by a SARS  
189 coronavirus-specific human monoclonal antibody. *Emerg Microbes Infect* **9**, 382-385,  
190 doi:10.1080/22221751.2020.1729069 (2020).
- 191 10 Yuan, M. *et al.* A highly conserved cryptic epitope in the receptor binding domains of  
192 SARS-CoV-2 and SARS-CoV. *Science* **368**, 630-633, doi:10.1126/science.abb7269  
193 (2020).
- 194 11 Huo, J. *et al.* Neutralization of SARS-CoV-2 by Destruction of the Prefusion Spike. *Cell*  
195 *Host Microbe* **28**, 445-454 e446, doi:10.1016/j.chom.2020.06.010 (2020).
- 196 12 Wrobel, A. G. *et al.* Antibody-mediated disruption of the SARS-CoV-2 spike glycoprotein.  
197 *Nat Commun* **11**, 5337, doi:10.1038/s41467-020-19146-5 (2020).
- 198 13 Finkelstein, M. T. *et al.* Structural Analysis of Neutralizing Epitopes of the SARS-CoV-2  
199 Spike to Guide Therapy and Vaccine Design Strategies. *Viruses* **13**,  
200 doi:10.3390/v13010134 (2021).
- 201 14 Chi, X. *et al.* A neutralizing human antibody binds to the N-terminal domain of the Spike  
202 protein of SARS-CoV-2. *Science* **369**, 650-655, doi:10.1126/science.abc6952 (2020).
- 203 15 Dearlove, B. *et al.* A SARS-CoV-2 vaccine candidate would likely match all currently  
204 circulating variants. *Proc Natl Acad Sci U S A* **117**, 23652-23662,  
205 doi:10.1073/pnas.2008281117 (2020).
- 206 16 Rausch, J. W., Capoferri, A. A., Katusiime, M. G., Patro, S. C. & Kearney, M. F. Low  
207 genetic diversity may be an Achilles heel of SARS-CoV-2. *Proc Natl Acad Sci U S A*  
208 **117**, 24614-24616, doi:10.1073/pnas.2017726117 (2020).
- 209 17 Greaney, A. J. *et al.* Comprehensive mapping of mutations to the SARS-CoV-2 receptor-  
210 binding domain that affect recognition by polyclonal human serum antibodies. *bioRxiv*,  
211 2020.2012.2031.425021, doi:10.1101/2020.12.31.425021 (2021).
- 212 18 Greaney, A. J. *et al.* Complete Mapping of Mutations to the SARS-CoV-2 Spike  
213 Receptor-Binding Domain that Escape Antibody Recognition. *Cell Host Microbe* **29**, 44-  
214 57 e49, doi:10.1016/j.chom.2020.11.007 (2021).
- 215 19 Starr, T. N. *et al.* Deep Mutational Scanning of SARS-CoV-2 Receptor Binding Domain  
216 Reveals Constraints on Folding and ACE2 Binding. *Cell* **182**, 1295-1310 e1220,  
217 doi:10.1016/j.cell.2020.08.012 (2020).
- 218 20 Liu, Z. *et al.* Identification of SARS-CoV-2 spike mutations that attenuate monoclonal  
219 and serum antibody neutralization. *Cell Host Microbe*, doi:10.1016/j.chom.2021.01.014  
220 (2021).
- 221 21 Katoh, K., Misawa, K., Kuma, K. & Miyata, T. MAFFT: a novel method for rapid multiple  
222 sequence alignment based on fast Fourier transform. *Nucleic Acids Res* **30**, 3059-3066,  
223 doi:10.1093/nar/gkf436 (2002).
- 224 22 Katoh, K. & Standley, D. M. MAFFT multiple sequence alignment software version 7:  
225 improvements in performance and usability. *Mol Biol Evol* **30**, 772-780,  
226 doi:10.1093/molbev/mst010 (2013).
- 227 23 Price, M. N., Dehal, P. S. & Arkin, A. P. FastTree: computing large minimum evolution  
228 trees with profiles instead of a distance matrix. *Mol Biol Evol* **26**, 1641-1650,  
229 doi:10.1093/molbev/msp077 (2009).
- 230 24 Stamatakis, A. RAxML version 8: a tool for phylogenetic analysis and post-analysis of  
231 large phylogenies. *Bioinformatics* **30**, 1312-1313, doi:10.1093/bioinformatics/btu033  
232 (2014).



- 233 25 Watanabe, A. *et al.* Antibodies to a Conserved Influenza Head Interface Epitope Protect  
234 by an IgG Subtype-Dependent Mechanism. *Cell* **177**, 1124-1135 e1116,  
235 doi:10.1016/j.cell.2019.03.048 (2019).
- 236 26 Crawford, K. H. D. *et al.* Protocol and Reagents for Pseudotyping Lentiviral Particles with  
237 SARS-CoV-2 Spike Protein for Neutralization Assays. *Viruses* **12**,  
238 doi:10.3390/v12050513 (2020).
- 239 27 Klimstra, W. B. *et al.* SARS-CoV-2 growth, furin-cleavage-site adaptation and  
240 neutralization using serum from acutely infected hospitalized COVID-19 patients. *J Gen*  
241 *Viro*, doi:10.1099/jgv.0.001481 (2020).
- 242 28 Ashkenazy, H. *et al.* ConSurf 2016: an improved methodology to estimate and visualize  
243 evolutionary conservation in macromolecules. *Nucleic Acids Res* **44**, W344-350,  
244 doi:10.1093/nar/gkw408 (2016).
- 245 29 Celniker, G. *et al.* ConSurf: Using Evolutionary Data to Raise Testable Hypotheses  
246 about Protein Function. *Israel Journal of Chemistry* **53**, 199-206,  
247 doi:<https://doi.org/10.1002/ijch.201200096> (2013).
- 248

249 **Figures:**

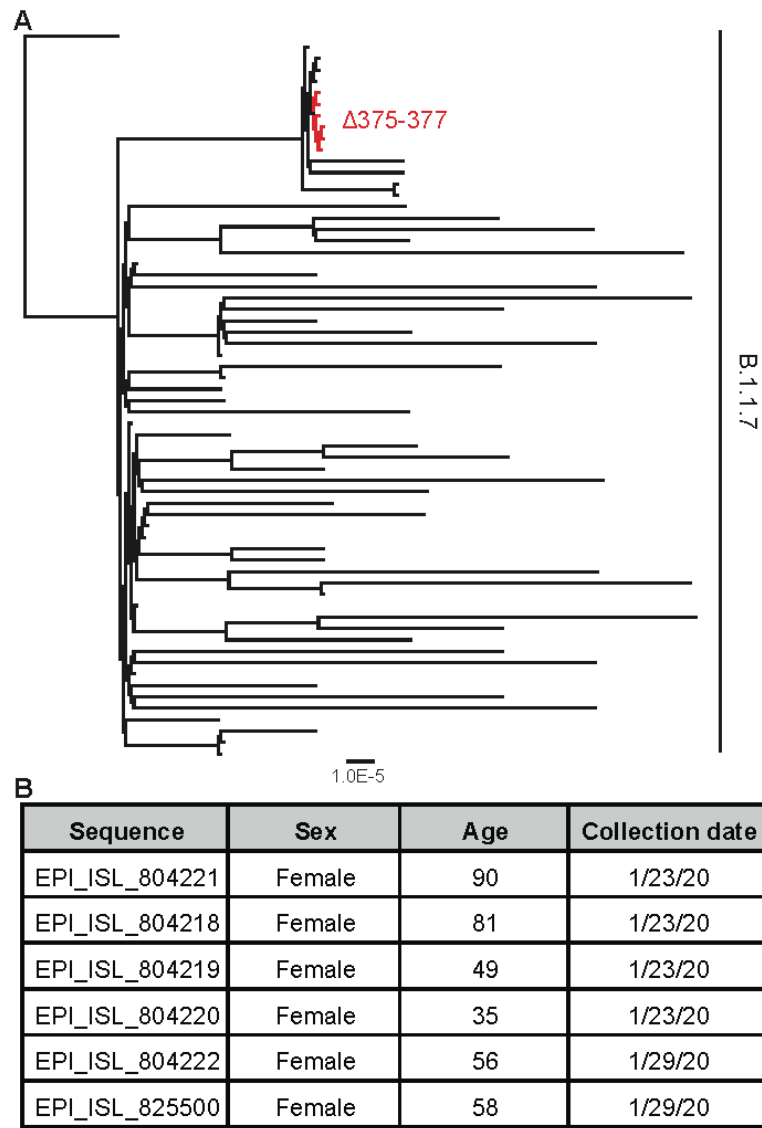

250

251

252

253 **Fig. 1. Transmission cluster within the B.1.1.7 lineage with a novel deletion in RBD. a.**

254 SARS-CoV-2 genome sequences with a nine-nucleotide deletion at codons 375-377 (red

255 branches) cluster together among contemporaneously circulating B.1.1.7 isolates (black

256 branches). The maximum likelihood phylogenetic tree is, rooted on EPI\_ISL\_581117 and was

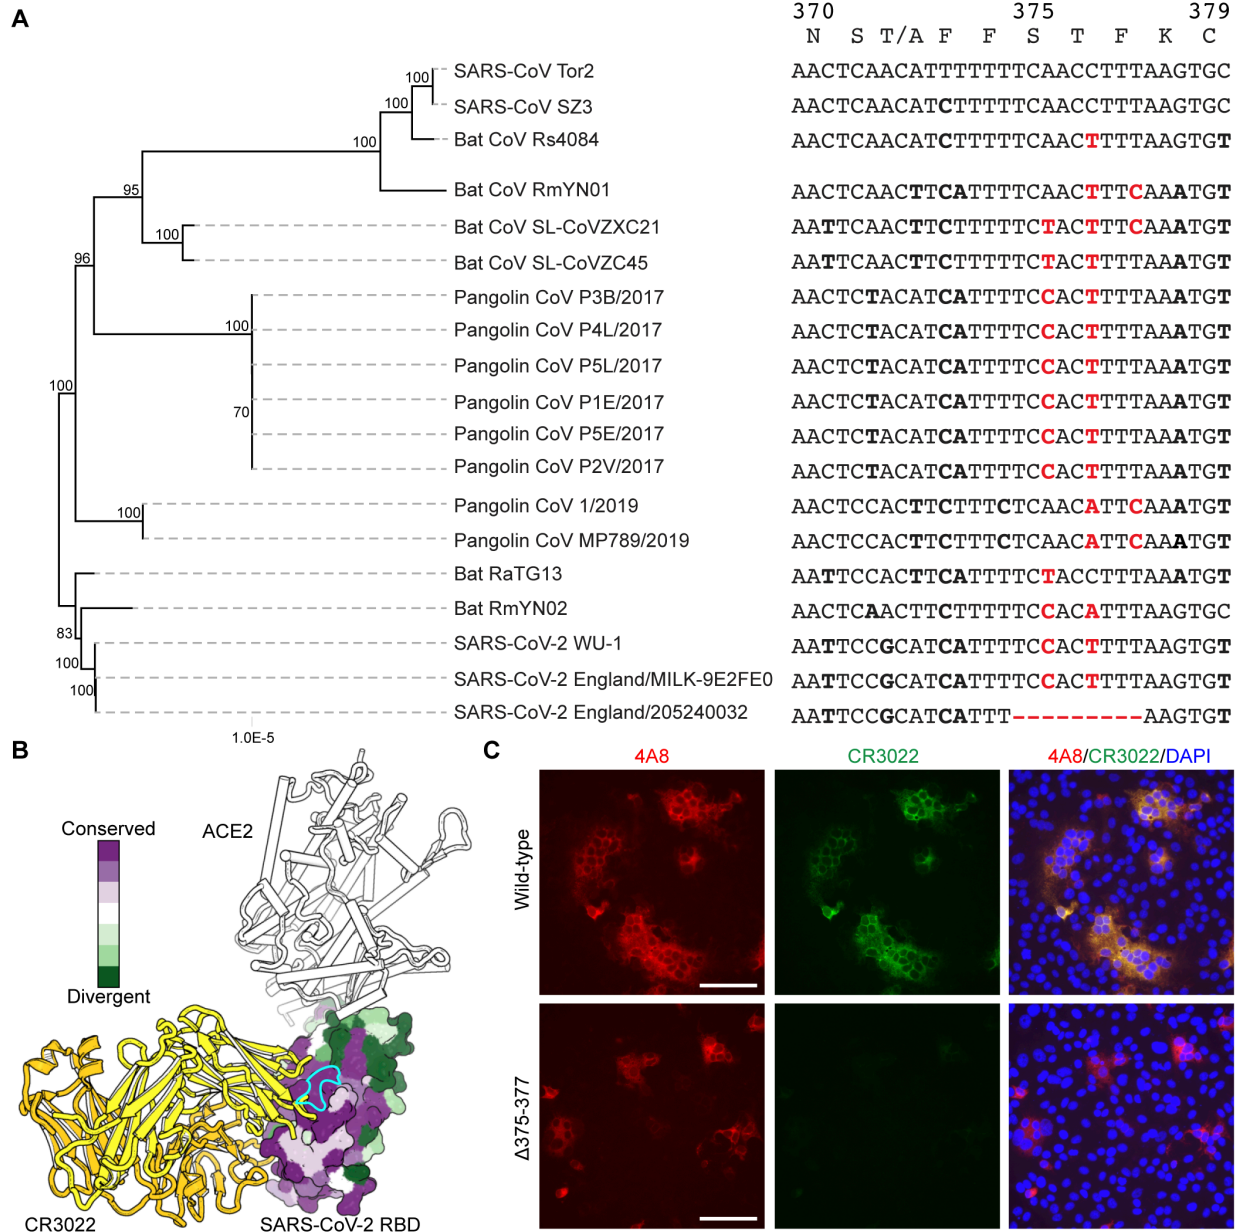

257 calculated with 10,000 bootstrap replicates. **b.** GISAID accession numbers and metadata from

258 the six individuals.

259

260

261 **Fig. 2. Deletion of a conserved site abolishes CR3022 binding a.** phylogeny of sarbecovirus

262 genomes and nucleotide sequences of the deletion region. Differences from SARS-CoV Tor2

263 are shown in bold and in red for codons 375-377. SARS-CoV Tor2 specific translation and

264 amino acid numbering is above. The maximum likelihood phylogenetic tree was calculated with

265 10,000 bootstrap replicates. **b.** A structure of SARS-CoV-2 bound with ACE2 (white) (PDB:

266 6M0J). CR3022 (6W41) (yellows) has been docked in by aligning ACE2 RBDs. The RBD  
267 surface is colored by conservation among the coronavirus isolates above using ConSurf<sup>28,29</sup>  
268 and residues 375-377 are circled in cyan. S glycoprotein distribution in Vero E6 cells at 24 h  
269 post-transfection with plasmids encoding SARS-CoV-2 S- $\Delta$ 375-377 or wild-type S glycoprotein,  
270 visualized by indirect immunofluorescence in permeabilized cells. A monoclonal antibody  
271 against the N-terminal domain of SARS-CoV-2 S protein (4A8; red) detects wild-type and  
272 mutant protein. CR3022 monoclonal antibody (CR3022; green) does not detect the S- $\Delta$ 375-377  
273 mutant. Overlay images (4A8/CR3022/DAPI) depict co-localization of the antibodies; nuclei  
274 were counterstained with DAPI (blue). The scale bars represent 100  $\mu$ m.
